# Supplementary material
Source: Research Square preprint supplement (doi:10.21203/rs.3.rs-9357878/v1)
Supplement: Supplementary file 1 [file 20cdff97665bf4c59b02b1b6.docx]

**Supplementary materials**

# Machine Learning-Driven Discovery and Experimental Validation of Novel STING Inhibitors from Traditional Chinese Medicine

### Tian Zhao1 2 3 , Dan Chen 1 2 3, Zongjun Chen 4,Qionghui Wang1 2 3, Jun Qing1 2 3, Qiang Huang1 2 3, Yihuan Zhao1 2 3*, Lei Zhu1 2 3*

*1 School of Pharmacy, Zunyi Medical University, Zunyi, Guizhou 563006, China.*

*2 Key Laboratory of Basic Pharmacology of Ministry of Education, Zunyi Medical University, Zunyi, Guizhou 563006, China*

*3The Key Laboratory of Clinical Pharmacy of Zunyi City, Zunyi Medical University, Zunyi, Guizhou 563006, China*

*4Department of Endocrinology, Kweichow Moutai Hospital, Renhuai, Guizhou 564500, China*

* Corresponding author: Dr. Lei Zhu , Dr. Yihuan Zhao

Email address: [zhuleilei@live.cn, zhuleimail@zmu.edu.cn](mailto:zhuleilei@live.cn;zhuleimail@zmu.edu.cn) (Lei Zhu); [2225694159@qq.com](mailto:2225694159@qq.com) (Yihuan Zhao )


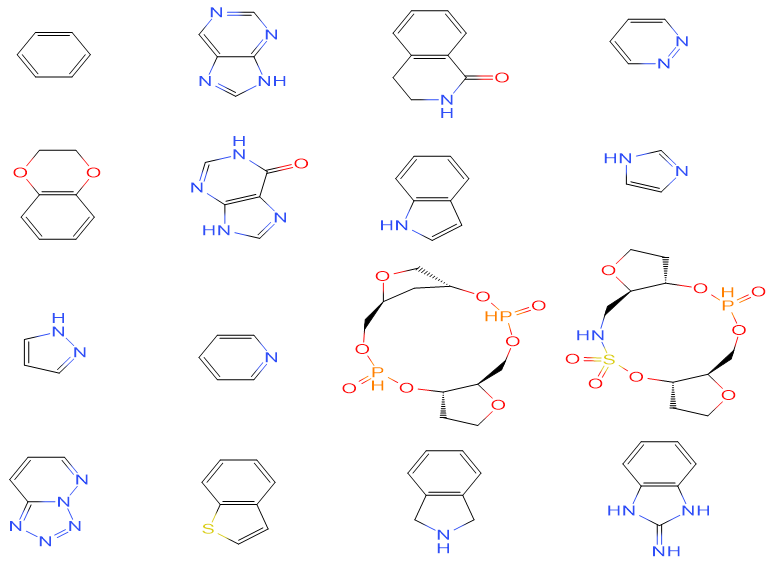


**Fig. S1** The top 16 plain rings of 492 STING inhibitors dataset

**Table S1** The top 26 plain ring had a frequency exceeding 10 of 492 STING inhibitors dataset

| **SMILES** | **Frequency** |
| --- | --- |
| c1ccccc1 | 379 |
| n1c2[nH]cnc2cnc1 | 125 |
| O=C1NCCc2c1cccc2 | 95 |
| n1ncccc1 | 79 |
| O1c2c(OCC1)cccc2 | 78 |
| O=c1[nH]cnc2c1nc[nH]2 | 71 |
| [nH]1c2c(cc1)cccc2 | 62 |
| n1c[nH]cc1 | 62 |
| n1[nH]ccc1 | 50 |
| n1ccccc1 | 27 |
| P1(=O)O[C@@H]2[C@H](OCC2)COP(=O)O[C@@H]2C[C@@H](CO1)OC2 | 24 |
| S1(=O)(=O)O[C@@H]2[C@H](OCC2)COP(=O)O[C@@H]2[C@@H](CN1)OCC2 | 23 |
| n1n2nnnc2ccc1 | 21 |
| s1c2c(cc1)cccc2 | 20 |
| N1Cc2c(C1)cccc2 | 18 |
| N=c1[nH]c2c([nH]1)cccc2 | 16 |
| O=c1[nH]cnc2c1cc[nH]2 | 16 |
| C1CCCCC1 | 16 |
| O=c1c2c([nH]c3c1cccc3)cccc2 | 15 |
| n1c2c([nH]c1)cccc2 | 14 |
| n1c2n(ncc2)ccc1 | 13 |
| C1CC1 | 11 |
| P1(=O)O[C@@H]2[C@@H](COP(=O)O[C@@H]3C[C@@H](CO1)OC3)CCC2 | 11 |
| o1c2c(cc1)cccc2 | 10 |
| N1CCCCC1 | 10 |
| O1CCNCC1 | 10 |

**Table S2** The top 30 Murcko scaffold of 492 STING inhibitors

| **SMILES** | **Frequency** |
| --- | --- |
| O=C1N(c2ccccc2)[C@H](c2cc3OCCOc3cc2)Cc2c1cccc2 | 21 |
| P1(=O)O[C@H]2[C@@H](O[C@@H](C2)COP(=O)O[C@@H]2[C@@H](CO1)O[C@H](C2)n1c2ncncc2nc1)n1c2nc[nH]c(=O)c2nc1 | 16 |
| O=C1N(c2ccccc2)[C@@H](c2cc3OCCOc3cc2)Cc2c1cccc2 | 16 |
| O=C(Nc1ccccc1)Nc1c2c([nH]c1)cccc2 | 13 |
| S1(=O)(=O)O[C@@H]2[C@H](O[C@H](C2)n2c3nc[nH]c(=O)c3nc2)COP(=O)O[C@@H]2[C@@H](CN1)O[C@H](C2)n1c2ncncc2nc1 | 12 |
| s1c2c(cc1)cc(cc2)OCCCOc1cc2c(cc1)CNC2 | 12 |
| S(=O)(=O)(Nc1cc(NC(=O)c2ccc(cc2)c2ccccc2)ccc1)c1ccccc1 | 10 |
| O=c1c2c([nH]c3c1cccc3)cccc2 | 9 |
| P1(=O)OC2[C@H](O[C@H](C2)n2c3ncncc3nc2)COP(=O)OC2[C@@H](CO1)O[C@H](C2)n1c2nc[nH]c(=O)c2cc1 | 8 |
| P1(=O)OC2[C@H](O[C@H](C2)n2c3ncncc3nc2)COP(=O)O[C@H]2[C@@H](CO1)O[C@H](C2)n1c2ncncc2nc1 | 7 |
| P1(=O)OC2C(OC(C2)COP(=O)OC2C(CO1)OC(C2)n1c2ncncc2nc1)n1c2nc[nH]c(=O)c2nc1 | 7 |
| P1(=O)O[C@H]2[C@@H](O[C@@H](C2)COP(=O)O[C@@H]2[C@@H](CO1)O[C@H](C2)n1c2ncncc2nc1)n1c2nc[nH]c(=O)c2cc1 | 7 |
| O=C(NCc1oc2c(c1)cccc2)c1c2ncccn2nc1 | 7 |
| S1(=O)(=O)O[C@@H]2[C@H](O[C@H](C2)n2c3ncncc3nc2)COP(=O)O[C@@H]2[C@@H](CN1)O[C@H](C2)n1c2nc[nH]c(=O)c2nc1 | 6 |
| O=C(Nc1ccccc1)c1nnc(cc1)n1cccc1 | 6 |
| O=C(Nc1cc(ccc1)CCCc1cc(NC(=O)c2nn3nnnc3cc2)ccc1)c1nnc(cc1)n1cncc1 | 5 |
| S1(=O)(=O)O[C@@H]2[C@H](O[C@H](C2)n2c3ncncc3nc2)COP(=O)O[C@@H]2[C@@H](CN1)O[C@H](C2)n1c2ncncc2nc1 | 5 |
| P1(=O)O[C@@H]2[C@@H](COP(=O)O[C@@H]3C[C@@H](CO1)O[C@H]3n1c3nc[nH]c(=O)c3nc1)C[C@H](C2)n1c2ncncc2cc1 | 5 |
| O=C1N(c2ccncc2)[C@@H](c2cc3OCCOc3cc2)Cc2c1cccc2 | 5 |
| O=C(Nc1ccccc1)c1occc1 | 4 |
| P1(=O)OC2[C@H](O[C@H](C2)n2c3ncncc3nc2)COP(=O)O[C@H]2[C@@]3(CO1)O[C@H](C2OC3)n1c2ncncc2nc1 | 4 |
| P1(=O)O[C@H]2[C@@H](O[C@@H](C2)COP(=O)O[C@@H]2[C@@]3(CO1)O[C@H]([C@@H]2OC3)n1c2ncncc2nc1)n1c2nc[nH]c(=O)c2nc1 | 4 |
| O=C(Nc1cc(ccc1)CCOc1cc(NC(=O)c2nn3nnnc3cc2)ccc1)c1nnc(cc1)n1cncc1 | 4 |
| O=C(Nc1cc(OCCc2cc(NC(=O)c3nnc(cc3)n3cncc3)ccc2)ccc1)c1nnc(cc1)n1cncc1 | 4 |
| s1c(nc(c1)c1ccccc1)C(=O)Nc1ccccc1 | 4 |
| O=C(Nc1ccccc1)c1cnn(c1)c1ccccc1 | 4 |
| O=C(Nc1ccccc1)c1nnc(cc1)c1cnncc1 | 4 |
| O=C(Nc1cc2[nH]ccc2cc1)Nc1ccccc1 | 4 |
| O=C(Nc1cc(OCCCCOc2cc(NC(=O)c3nn4nnnc4cc3)ccc2)ccc1)c1nnc(cc1)n1cncc1 | 3 |
| O=C1N(c2ccc(cc2)N2CCOCC2)[C@@H](c2cc3OCCOc3cc2)Cc2c1cccc2 | 3 |


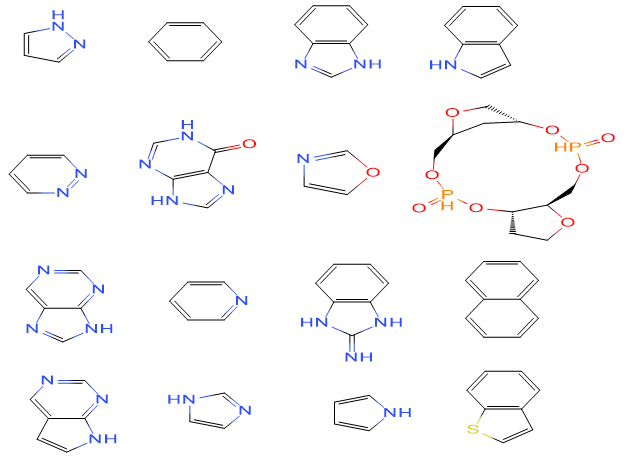


**Fig. S2** The top 16 plain rings of 522 STING agonists dataset

**Table S3** The top 21 plain ring had a frequency exceeding 10 of 522 STING agonists dataset

| **SMILES** | **Frequency** |
| --- | --- |
| n1[nH]ccc1 | 288 |
| c1ccccc1 | 268 |
| n1c2c([nH]c1)cccc2 | 237 |
| [nH]1c2c(cc1)cccc2 | 62 |
| n1ncccc1 | 58 |
| O=c1[nH]cnc2c1nc[nH]2 | 45 |
| o1cncc1 | 42 |
| n1c2[nH]cnc2cnc1 | 37 |
| P1(=O)O[C@@H]2[C@H](OCC2)COP(=O)O[C@@H]2C[C@@H](CO1)OC2 | 37 |
| n1ccccc1 | 34 |
| N=c1[nH]c2c([nH]1)cccc2 | 29 |
| n1c[nH]cc1 | 21 |
| c12c(cccc1)cccc2 | 19 |
| s1c2c(cc1)cccc2 | 18 |
| o1c2c(cc1)cccc2 | 16 |
| n1c2[nH]ccc2cnc1 | 16 |
| [nH]1cccc1 | 16 |
| O1CCNCC1 | 15 |
| n1cnccc1 | 14 |
| n1c2n(ncc2)ccc1 | 12 |
| n1ncc[nH]1 | 11 |

**Table S4** The top 30 Murcko scaffold of 522 STING agonists

| **SMILES** | **frequency** |
| --- | --- |
| O=C(OCc1ccccc1)NCCCn1c(nc2c1cccc2)NC(=O)c1[nH]ncc1 | 32 |
| O=C(Nc1nc2c([nH]1)cccc2)c1[nH]ncc1 | 22 |
| O=C(Nc1nc2c(n1CCCNc1oc(cn1)c1ccccc1)cccc2)c1[nH]ncc1 | 21 |
| O=C(Nc1ccccc1)c1nnc(cc1)n1cccc1 | 14 |
| O=C(Nc1ccccc1)c1nnc(cc1)c1cnncc1 | 11 |
| s1c2c(cc1)cccc2 | 10 |
| O=C(Nc1nc2c(n1NCCCC(=O)NCc1ccccc1)cccc2)c1[nH]ncc1 | 10 |
| O=C(NCc1oc2c(c1)cccc2)c1c2ncccn2nc1 | 9 |
| O=C(NC/C=C/Cn1c(nc2c1cccc2)NC(=O)c1[nH]ncc1)c1ccccc1 | 7 |
| O=c1c2c([nH]c3c1cccc3)cccc2 | 7 |
| P1(=O)O[C@@H]2[C@@H](COP(=O)O[C@@H]3C[C@@H](CO1)O[C@H]3n1c3nc[nH]c(=O)c3nc1)C[C@H](C2)Oc1ncncc1 | 6 |
| O=C(/N=c\1/n(c2c([nH]1)cccc2)C/C=C/Cn1/c(=N/C(=O)c2[nH]ncc2)/[nH]c2c1cccc2)c1[nH]ncc1 | 5 |
| O=C(Nc1c2c([nH]c1)cccc2)c1cnn(c1)Cc1ccccc1 | 5 |
| O=C(Nc1c2c([nH]c1)cccc2)c1n[nH]c(c1)c1ccccc1 | 5 |
| O=C(Nc1nc2c(n1C/C=C/Cn1c(nc3c1cccc3)NC(=O)c1[nH]ncc1)cccc2)c1[nH]ncc1 | 4 |
| O=C(Nc1nc2c(n1C/C=C/Cn1c3c(nc1)cccc3)cccc2)c1[nH]ncc1 | 4 |
| P1(=O)O[C@H]2[C@@H](O[C@@H](C2)COP(=O)O[C@@H]2[C@@H](CO1)O[C@H](C2)n1c2ncncc2nc1)n1c2nc[nH]c(=O)c2nc1 | 4 |
| O=C1N(c2c(C1)ccc(c2)C(=O)NCc1ccccc1)Cc1ccccc1 | 4 |
| O=c1c2c(oc3c1cccc3)cccc2 | 4 |
| O=C1c2c(Nc3c(C1)cccc3)cccc2 | 3 |
| O=C(Nc1c2c([nH]c1)cccc2)c1ncn(c1)Cc1ccccc1 | 3 |
| O=C(Nc1c2c([nH]c1)ccnc2)c1cnn(c1)Cc1ccccc1 | 3 |
| O=C(Nc1c2c([nH]c1)cccc2)c1nnn(c1)c1cnccc1 | 3 |
| [se]1c2c(cc1)cccc2 | 2 |
| O=C(OCc1ccccc1)NCCCn1c(nc2c1cccc2)NC(=O)c1nnccc1 | 2 |
| O=C(OCc1ccccc1)NCCCn1c(nc2c1cccc2)NC(=O)c1ncccc1 | 2 |
| O=C(/N=c\1/n(c2c([nH]1)cccc2OCCCN1CCOCC1)C/C=C/Cn1/c(=N/C(=O)c2[nH]ncc2)/[nH]c2c1cccc2)c1[nH]ncc1 | 2 |
| O=C(NCc1cc2c(cc1)cccc2)NCCCNn1c(nc2c1cccc2)NC(=O)c1[nH]ncc1 | 2 |
| P1(=O)O[C@H]2[C@@H](O[C@@H](C2)COP(=O)O[C@@H]2[C@@H](CO1)O[C@H](C2)[C@H]1c2ncncc2N=C1)n1cncc1 | 2 |
| O=C(Nc1nc2c(n1C/C=C/Cn1c(nc3c1cccc3)NC(=O)c1ocnc1)cccc2)c1ocnc1 | 2 |

**Table S5** The descriptions of the molecular fingerprints used in the study

| **Fingerprint** | **Number** | **Description** |
| --- | --- | --- |
| CDK fingerprint | 1024 | Fingerprint of length 1024 and search depth of 8 |
| CDK extended fingerprint | 1024 | Extends the Fingerprinter with additional bits describing ring features |
| Substructure fingerprint | 307 | Presence of SMARTS Patterns for Functional Group Classification by Christian Laggner |
| Substructure fingerprint count | 307 | Count of SMARTS Patterns for Functional Group Classification by Christian Laggner |

**Table S6** Optimal Parameter Values for Different Classification Machine Learning Prediction Models

| **LightGBM** | | **RF** | | **KNN** | |
| --- | --- | --- | --- | --- | --- |
| Number of estimators | 300 | Number of estimators | 300 | n_neighbors | 4 |
| learning rate | 0.01 | Min samples split | 10 |  |  |
| feature_fraction | 0.8 | Min samples leaf | 1 |  |  |
| num_leaves | 10 |  |  |  |  |
| min_child_samples | 60 |  |  |  |  |
| **MLP** | | **DT** | | **LR** | |
| activation | logistic | Min samples split | 2 | solver | sag |
| solver | adam | Min samples leaf | 16 | max_iter | 100 |
| max_iter | 500 | max_features | 4 | verbose | 0 |
| alpha | 0.0001 | min_weight_fraction_leaf | 0.0 | C | 0.1 |

**Table S7** Optimal Parameter Values for Different regression machine learning prediction models

| **LightGBM** | | **RF** | | **LASSO** | | **KNN** | |
| --- | --- | --- | --- | --- | --- | --- | --- |
| number of estimators | int, [100, 500] step=20 | number of estimators | int, [100, 500] step=20 | max_iter | int, [100, 500] step= | n_  neighbors | int, [2, 50] |
| learning rate | float, [0.0001, 1] |  |  | alpha | float, [0.0001, 1] |  |  |
| n_estimators=100, learning rate=0.1 | | n_estimators=220 | | max_iter=100, alpha=0.04 | | n_neighbors = 4 | |
| **PLS** | | **XGBoost** | | **SVR** | |  | |
| n_components | int, [2, 50] | number of estimators | int, [100, 500] step=20 | gamma | float, [0.0001, 1] |  |  |
|  |  |  |  | kernel | string, {rbf, sigmoid, linear} |  |  |
|  |  |  |  | C | float, [0, 1500] |  |  |
| n_components=6 | | n_estimators=100 | | gamma=0.02, C=122, kernel=rbf | |  |  |

**Table S8** The binding mode of seven potential STING inhibitors with STING

| **Compound** | **Conventional hydrogen bond** | **π-σ interactions** | **π-alkyl and Alkyl** |
| --- | --- | --- | --- |
| **Cassiaside** | Ser162,Gly166 | None | Tyr167 |
| **Plantaginin** | Ser162,Ser241,Pro209,ASP210,  Tyr245,Thr263 | None | Pro264 |
| **Iristectorigenin B** | Ser162,ASP210,Thr267,Val208 | Pro264 | None |
| **Parishin E** | Ser241,Ser243,ASP210,Thr263,  Thr267,Val208 | None | Ala270 |
| **Specnuezhenide** | Ser162,Gly166,Gln266,Thr263,  ASP210 | None | None |
| **Rubrofusarin gentiobioside** | Ser241,Ser243,Gln266,Tyr167,  Tyr245,Tyr167,Pro209 | None | Pro264 |
| **Nor-rubrofusarin gentiobioside** | Ser162,Gly166 | None | Tyr167 |

**Table S9** ADMET Prediction Results of 7 potential STING compounds

| **S.No** | **Molecules** | **Mol.MW** | **QPlogPo/w** | **GI Absorption** | **Bioavailability Score** | **Lipinski Rule of 5** | **Ames** | **H-HT** |
| --- | --- | --- | --- | --- | --- | --- | --- | --- |
| 1 | Cassiaside | 420.37g/mol | 0.29 | Low | 0.55 | Yes: 1 Violation | 0.944 | 0.746 |
| 2 | Plantaginin | 448.38 g/mol | 1.42 | Low | 0.17 | No; 2 violation | 0.307 | 0.648 |
| 3 | Iristectorigenin b | 330.29 g/mol | 2.11 | High | 0.55 | Yes: 0 Violation | 0.541 | 0.487 |
| 4 | Parishin E | 460.39 g/mol | 0.44 | Low | 0.11 | Yes: 1 Violation | 0.352 | 0.479 |
| 5 | Specnuezhenide | 686.66 g/mol | -1.28 | Low | 0.11 | N0: 3 Violation | 0.775 | 0.451 |
| 6 | Rubrofusarin gentiobioside | 596.53 g/mol | -1.07 | Low | 0.17 | No; 3 violation | 0.885 | 0.517 |
| 7 | Nor-rubrofusarin gentiobioside | 582.51g/mol | -1.46 | Low | 0.17 | No: 3 Violation | 0.975 | 0.648 |
